# Supplementary material for: Benchtop NMR Coupled with Chemometrics: A Workflow for Unveiling Hidden Drug Ingredients in Honey-Based Supplements
Source: MDPI journal article supplement (doi:10.3390/molecules29092086), 2024-05-01
Supplement: s1 [file s1]

**Table S1.** Natural occurring compounds detected in the honey-based supplements with benchtop NMR. The table does not include adulterants (see Table S2) or sugars.

| Honey Samples | 5-HMF | acetate | formate | ethanol | 2,3-butanediol | fatty acids |
|---------------|-------|---------|---------|---------|----------------|-------------|
| 1             | •     | •       |         |         | •              | •           |
| 2             |       |         |         |         |                |             |
| 3             |       |         |         |         | •              |             |
| 4             | •     |         |         |         |                |             |
| 5             |       | •       |         |         |                |             |
| 6             | •     | •       |         |         | •              | •           |
| 7             |       | •       |         | •       |                |             |
| 8             |       |         |         |         | •              | •           |
| 9             |       | •       |         |         |                |             |
| 10            | •     | •       |         |         | •              | •           |
| 11            |       |         |         |         | •              | •           |
| 12            | •     | •       |         |         | •              | •           |
| 13            |       |         |         |         | •              | •           |
| 14            |       | •       |         |         |                | •           |
| 15            |       | •       |         | •       |                | •           |
| 16            |       | •       | •       |         | •              | •           |
| 17            | •     |         | •       |         |                | •           |
| 18            |       |         |         |         | •              | •           |
| 19            | •     | •       | •       |         | •              | •           |
| 20            | •     | •       | •       | •       |                | •           |
| 21            | •     | •       | •       |         | •              | •           |
| 22            | •     |         | •       |         |                | •           |
| 23            | •     | •       | •       |         | •              | •           |
| 24            |       | •       |         |         | •              | •           |
| 25            | •     |         | •       |         | •              |             |
| 26            | •     |         | •       |         |                | •           |
| 27            | •     |         | •       |         |                | •           |
| 28            | •     |         |         |         | •              | •           |
| 29            |       | •       |         |         |                | •           |
| 30            |       |         |         |         | •              | •           |
| 31            |       | •       | •       |         | •              | •           |
| 32            |       |         |         |         | •              | •           |
| 33            |       | •       |         |         | •              | •           |
| 34            | •     | •       |         |         | •              | •           |
| 35            | •     | •       |         |         | •              | •           |
| 36            |       |         |         |         |                | •           |
| 37            | •     |         |         |         | •              |             |
| 38            |       |         |         |         |                | •           |
| 39            | •     |         |         |         | •              | •           |
| 40            | •     | •       |         |         | •              | •           |
| 41            |       | •       |         |         | •              | •           |
| 42            | •     |         |         |         |                | •           |
| 43            | •     | •       |         |         | •              | •           |
| 44            |       |         |         |         | •              | •           |
| 45            | •     |         |         |         | •              | •           |

[illegible]
