# Supplementary material for: Benchtop NMR Coupled with Chemometrics: A Workflow for Unveiling Hidden Drug Ingredients in Honey-Based Supplements
Source: MDPI journal article supplement (doi:10.3390/molecules29092086), 2024-05-01
Supplement: s1 [file s1]

**Table S2.** Honey supplements analyzed in this study along with adulterants detected and their benchtop NMR quantification.

| Honey Samples | Honey packet content | Adulterant               | Benchtop NMR quantification (mg/packet) |
|---------------|----------------------|--------------------------|-----------------------------------------|
| 1             | 20 g                 | Tadalafil                | 54 ± 3                                  |
| 2             | 15 g                 | Sildenafil               | 111 ± 6                                 |
| 3             | 10 g                 | -                        | -                                       |
| 4             | 10 g                 | Sildenafil               | 14 ± 1                                  |
| 5             | 30 g                 | Tadalafil                | 65 ± 8                                  |
| 6             | 10 g                 | Tadalafil                | 37 ± 2                                  |
| 7             | 10 g                 | Tadalafil<br>Flibanserin | 12 ± 1<br>23 ± 6 <sup>1</sup>           |
| 8             | 20 g                 | -                        | -                                       |
| 9             | 20 g                 | Tadalafil                | 80 ± 3                                  |
| 10            | 10 g                 | Tadalafil                | 39 ± 4                                  |
| 11            | 15 g                 | Tadalafil                | 79 ± 3                                  |
| 12            | 10 g                 | Tadalafil                | 44 ± 2                                  |
| 13            | 10 g                 | Tadalafil                | 20 ± 2                                  |
| 14            | 30 g                 | Tadalafil                | 69 ± 2                                  |
| 15            | 10 g                 | Tadalafil                | 60 ± 4                                  |
| 16            | 10 g                 | Tadalafil                | 17 ± 1                                  |
| 17            | 10 g                 | Tadalafil                | 18 ± 1                                  |
| 18            | 10 g                 | Tadalafil                | 12 ± 1                                  |
| 19            | 10 g                 | Tadalafil                | 65 ± 4                                  |
| 20            | 20 g                 | Tadalafil                | 39 ± 1                                  |
| 21            | 12 g                 | Tadalafil                | 58 ± 6                                  |
| 22            | 10 g                 | Tadalafil                | 13 ± 1                                  |
| 23            | 20 g                 | Tadalafil                | 65 ± 2                                  |
| 24            | 30 g                 | Tadalafil                | 61 ± 2                                  |
| 25            | 10 g                 | Tadalafil                | 24 ± 2                                  |
| 26            | 20 g                 | Tadalafil                | 28 ± 3                                  |
| 27            | 10 g                 | -                        | -                                       |
| 28            | 20 g                 | Tadalafil                | 25 ± 2                                  |
| 29            | 30 g                 | Tadalafil                | 41 ± 2                                  |
| 30            | 20 g                 | -                        | -                                       |
| 31            | 20 g                 | Tadalafil                | 10 ± 1                                  |
| 32            | 20 g                 | -                        | -                                       |
| 33            | 15 g                 | Tadalafil                | 19 ± 2                                  |
| 34            | 15 g                 | Tadalafil                | 44 ± 4                                  |
| 35            | 10 g                 | Tadalafil                | 46 ± 3                                  |
| 36            | 10 g                 | Tadalafil                | 24 ± 1                                  |
| 37            | 20 g                 | Tadalafil                | 11 ± 2                                  |
| 38            | 20 g                 | Tadalafil                | 7 ± 2                                   |
| 39            | 20 g                 | -                        | -                                       |
| 40            | 10 g                 | Tadalafil                | 53 ± 2                                  |
| 41            | 20 g                 | Tadalafil                | 35 ± 2                                  |
| 42            | 10 g                 | -                        | -                                       |
| 43            | 10 g                 | Tadalafil                | 69 ± 5                                  |
| 44            | 10 g                 | Tadalafil                | 44 ± 2                                  |

|    |                   |            |                      |
|----|-------------------|------------|----------------------|
| 45 | 15 g              | Tadalafil  | 33 ± 8               |
| 46 | 15 g              | Tadalafil  | 68 ± 5               |
| 47 | 20 g              | Tadalafil  | 87 ± 2               |
| 48 | 20 g              | Sildenafil | 201 ± 25             |
| 49 | 12 g              | Sildenafil | 80 ± 12              |
| 50 | 43 g <sup>2</sup> | Sildenafil | 73 ± 17 <sup>2</sup> |

<sup>1</sup>Quantification of flibanserin was done at 500 MHz with a classical qNMR experiment

<sup>2</sup> This sample was in the form of a viscous paste in a vial. Amount was calculated for 10 g of product.
